# Supplementary material for: Low voltage electrolyte-gated organic transistors making use of high surface area activated carbon gate electrodes
Source: Royal Society of Chemistry journal article supplement (doi:10.1039/c4tc00864b), 2014-01-01
Supplement: c4tc00864b1.pdf [file c4tc00864b1.pdf]

Electronic Supplementary Information for:

**Low Voltage Electrolyte-Gated Organic Transistors Making Use of High Surface Area Activated Carbon Gate Electrodes**

J. Sayago,<sup>a</sup> F. Soavi,<sup>b</sup> Y. Sivalingam,<sup>a</sup> F. Cicoira<sup>c</sup> and C. Santato<sup>\*a</sup>

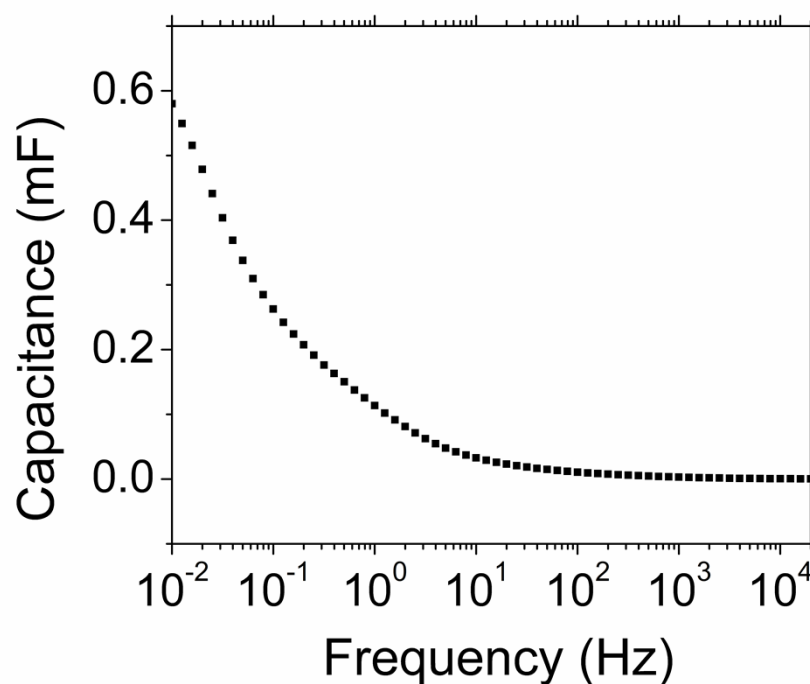

**Fig. S1** Frequency dependence of the capacitance of the MEH-PPV working electrode at 0.8 V vs activated carbon (small sized) quasi reference electrode with activated carbon gate as the counter electrode.

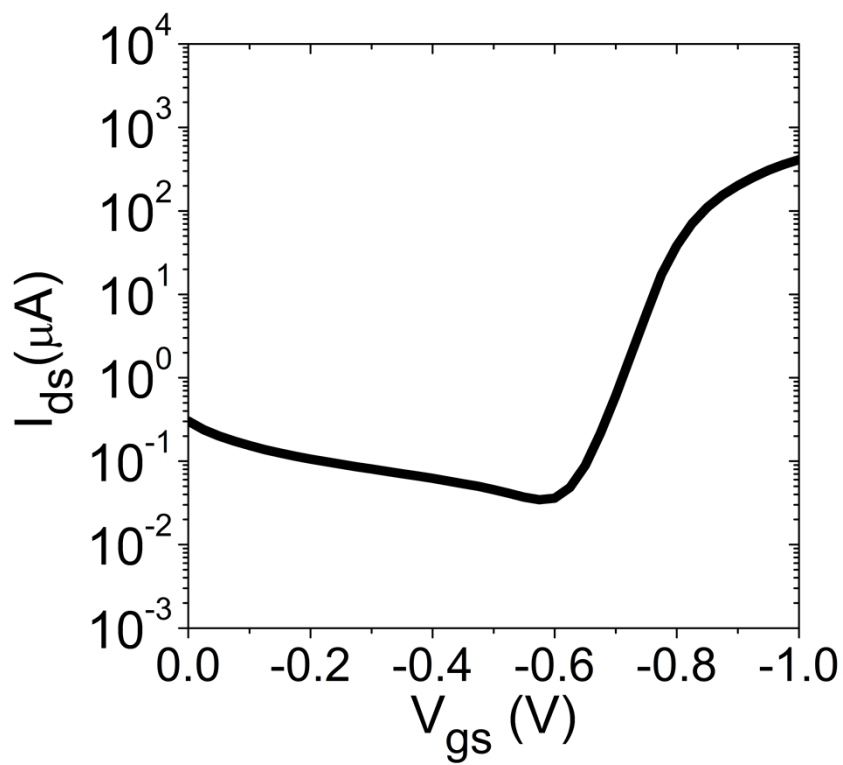

**Fig. S2** Transfer characteristics in the saturation regime ( $V_{ds} = -0.3$  V) for [EMIM][TFSI]-gated MEH-PPV transistors, sweep rate  $50 \text{ mV} \cdot \text{s}^{-1}$ .

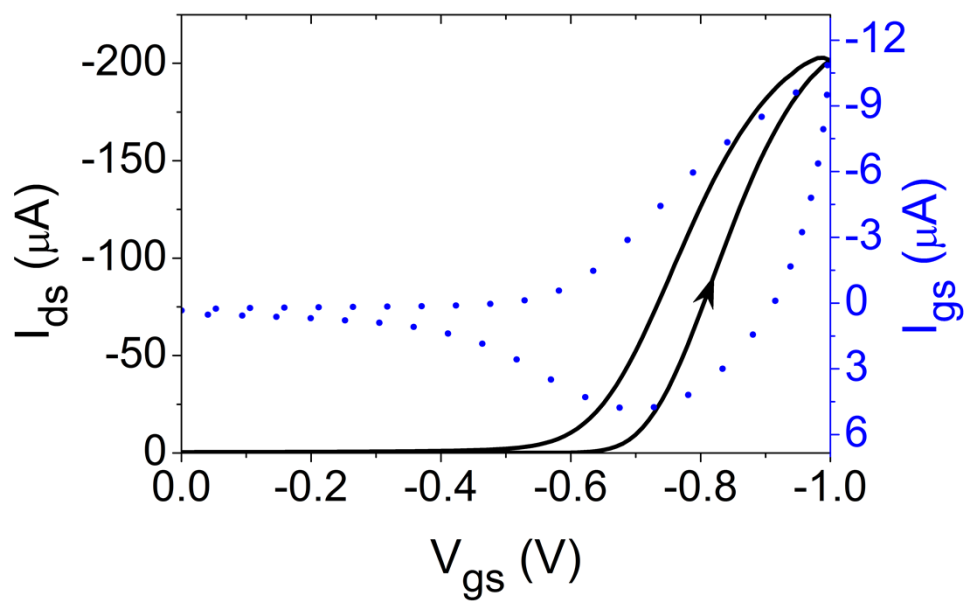

**Fig. S3** [EMIM][TFSI]-gated MEH-PPV transistor transfer characteristics in the linear regime ( $V_{ds} = -0.1$  V).  $I_{ds}$  (left axis, solid black line) and  $I_{gs}$  (right axis, dotted blue line) are plotted vs  $V_{gs}$ , sweep rate  $10 \text{ mV} \cdot \text{s}^{-1}$ .
